# Supplementary material for: An Evolutionary Insight into Zika Virus Strains Isolated in the Latin American Region
Source: MDPI journal article supplement (doi:10.3390/v10120698), 2018-12-08
Supplement: s1 [file s1]

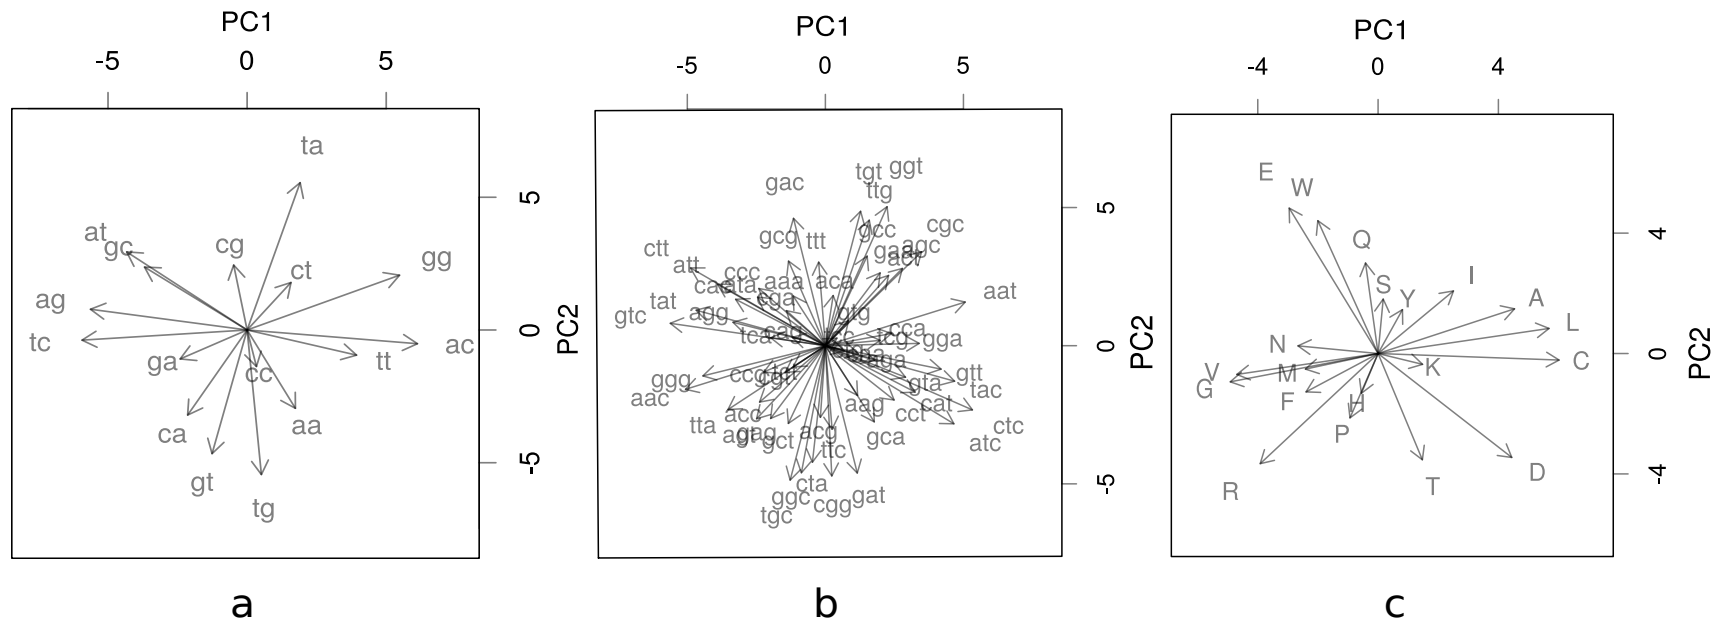

**Figure S1.** Loadings of each original variable for the first two major axes of principal component analysis of (a) dinucleotide observed/expected ratios, (b) relative synonymous codon usage, and (c) amino acid frequencies.
